# Supplementary material for: Antibiotic resistant Achromobacter xylosoxidans are highly susceptible to bacteriophages and often are killed synergistically by phage/antibiotic combinations
Source: Research Square preprint supplement (doi:10.21203/rs.3.rs-9371970/v1), 2026-04-30

**Table S1.** Antimicrobial susceptibility profiles of *A. xylosoxidans* isolates.

| Isolate | Bacteria               | Site                     | Amikacin | Gentamicin | Tobramycin | Imipenem | Meropenem | Cefepime | Ceftazidime | Ciprofloxacin | Levofloxacin | Aztreonam | Piperacillin / Tazobactam | Trimethoprim / Sulfamethoxazole | Classification <sup>a</sup> |
|---------|------------------------|--------------------------|----------|------------|------------|----------|-----------|----------|-------------|---------------|--------------|-----------|---------------------------|---------------------------------|-----------------------------|
| AX02    | <i>A. xylosoxidans</i> | Urine                    | R        | R          | N/A        | N/A      | N/A       | R        | S           | R             | N/A          | R         | S                         | S                               | MDR                         |
| AX05    | <i>A. xylosoxidans</i> | N/A                      | R        | R          | R          | S        | N/A       | R        | N/A         | R             | S            | R         | S                         | S                               | MDR                         |
| AX08    | <i>A. xylosoxidans</i> | Catheter Tip             | R        | R          | R          | N/A      | N/A       | I        | S           | R             | N/A          | R         | S                         | S                               | MDR                         |
| AX10    | <i>A. xylosoxidans</i> | CF respiratory           | R        | R          | R          | N/A      | N/A       | R        | R           | R             | N/A          | R         | S                         | S                               | MDR                         |
| AX11    | <i>A. xylosoxidans</i> | Respiratory Sputum       | R        | R          | R          | N/A      | N/A       | R        | R           | R             | N/A          | R         | S                         | S                               | MDR                         |
| AX12    | <i>A. xylosoxidans</i> | Respiratory Sputum       | R        | R          | R          | N/A      | S         | R        | S           | R             | N/A          | R         | S                         | N/A                             | MDR                         |
| AX13    | <i>A. xylosoxidans</i> | Urine                    | R        | R          | R          | N/A      | N/A       | R        | S           | I             | N/A          | R         | S                         | S                               | MDR                         |
| AX14    | <i>A. xylosoxidans</i> | Respiratory Sputum       | R        | R          | R          | S        | R         | R        | S           | R             | N/A          | R         | S                         | S                               | MDR                         |
| AX15    | <i>A. xylosoxidans</i> | Respiratory Sputum       | R        | R          | R          | N/A      | N/A       | R        | R           | R             | N/A          | R         | S                         | S                               | MDR                         |
| AX19    | <i>A. xylosoxidans</i> | HM-235, reference strain | R        | R          | R          | S        | N/A       | R        | N/A         | R             | R            | R         | S                         | S                               | MDR                         |
| AX23    | <i>A. xylosoxidans</i> | Right Leg Drainage       | R        | R          | R          | N/A      | N/A       | R        | S           | R             | S            | R         | S                         | S                               | MDR                         |
| AX25    | <i>A. xylosoxidans</i> | Respiratory Sputum       | R        | R          | R          | S        | S         | R        | R           | R             | R            | R         | R                         | S                               | MDR                         |
| AX27    | <i>A. xylosoxidans</i> | Blood                    | R        | R          | R          | N/A      | N/A       | I        | S           | I             | S            | R         | S                         | S                               | MDR                         |
| AX28    | <i>A. xylosoxidans</i> | Respiratory Sputum       | R        | R          | R          | S        | S         | R        | R           | R             | R            | R         | R                         | S                               | MDR                         |
| AX29    | <i>A. xylosoxidans</i> | Tracheal Aspirate        | R        | R          | R          | N/A      | N/A       | R        | S           | R             | S            | R         | S                         | S                               | MDR                         |
| AX33    | <i>A. xylosoxidans</i> | Respiratory Sputum       | R        | R          | R          | N/A      | N/A       | R        | R           | I             | S            | R         | S                         | S                               | MDR                         |
| AX34    | <i>A. xylosoxidans</i> | Leg tissue               | R        | R          | R          | S        | N/A       | R        | S           | R             | I            | R         | S                         | S                               | MDR                         |
| AX36    | <i>A. xylosoxidans</i> | Respiratory Sputum       | R        | R          | R          | N/A      | N/A       | S        | S           | R             | S            | R         | S                         | S                               | MDR                         |
| AX38    | <i>A. xylosoxidans</i> | Bronchoscopy washings    | R        | R          | R          | N/A      | N/A       | R        | S           | R             | S            | R         | S                         | S                               | MDR                         |
| AX39    | <i>A. xylosoxidans</i> | Blood                    | R        | R          | R          | S        | N/A       | R        | N/A         | I             | S            | I         | S                         | S                               | MDR                         |

|      |                   |                              |   |   |     |     |     |   |     |     |     |     |   |   |     |
|------|-------------------|------------------------------|---|---|-----|-----|-----|---|-----|-----|-----|-----|---|---|-----|
| AX41 | A.<br>xylooxidans | Urine,<br>Catheter           | R | R | R   | N/A | N/A | R | R   | R   | R   | R   | S | S | MDR |
| AX42 | A.<br>xylooxidans | Right leg<br>Drainage        | R | R | R   | N/A | N/A | S | S   | I   | S   | R   | S | S | MDR |
| AX44 | A.<br>xylooxidans | Bronchosco<br>py<br>washings | R | R | R   | N/A | N/A | S | S   | R   | S   | R   | R | S | MDR |
| AX46 | A.<br>xylooxidans | Respiratory<br>sputum        | S | S | S   | S   | S   | I | S   | I   | I   | R   | S | S | MDR |
| AX47 | A.<br>xylooxidans | Respiratory<br>sputum        | R | R | R   | N/A | N/A | I | I   | I   | I   | R   | S | S | MDR |
| AX48 | A.<br>xylooxidans | Bronchosco<br>py<br>washings | R | R | R   | N/A | N/A | R | S   | R   | R   | R   | S | S | MDR |
| AX50 | A.<br>xylooxidans | Respiratory<br>sputum        | R | R | R   | S   | N/A | R | N/A | R   | R   | N/A | S | S | MDR |
| AX52 | A.<br>xylooxidans | Respiratory<br>sputum        | R | R | R   | N/A | N/A | S | S   | I   | S   | R   | S | S | MDR |
| AX55 | A.<br>xylooxidans | Blood                        | R | R | R   | S   | N/A | R | S   | R   | I   | R   | S | S | MDR |
| AX57 | A.<br>xylooxidans | Blood                        | R | R | R   | S   | N/A | R | N/A | R   | S   | R   | S | S | MDR |
| AX01 | A.<br>xylooxidans | Respiratory<br>sputum        | R | R | R   | N/A | N/A | R | I   | R   | N/A | R   | S | S | XDR |
| AX07 | A.<br>xylooxidans | Maxilla                      | R | R | R   | N/A | N/A | R | I   | R   | N/A | R   | S | S | XDR |
| AX09 | A.<br>xylooxidans | Respiratory<br>sputum        | R | R | R   | N/A | N/A | R | I   | R   | N/A | R   | S | S | XDR |
| AX16 | A.<br>xylooxidans | Respiratory<br>sputum        | R | R | N/A | N/A | R   | R | R   | N/A | R   | R   | R | R | XDR |
| AX20 | A.<br>xylooxidans | Respiratory<br>sputum        | R | R | R   | S   | R   | R | R   | R   | R   | R   | S | R | XDR |
| AX21 | A.<br>xylooxidans | Throat                       | R | R | R   | S   | R   | R | R   | R   | R   | R   | S | R | XDR |
| AX22 | A.<br>xylooxidans | Respiratory<br>sputum        | R | R | R   | S   | R   | R | R   | R   | R   | R   | R | R | XDR |
| AX24 | A.<br>xylooxidans | Respiratory<br>sputum        | R | R | R   | S   | R   | R | I   | R   | R   | R   | I | R | XDR |
| AX30 | A.<br>xylooxidans | Respiratory<br>sputum        | R | R | R   | R   | R   | R | I   | R   | R   | R   | S | R | XDR |
| AX31 | A.<br>xylooxidans | Respiratory<br>sputum        | R | R | R   | N/A | N/A | R | I   | R   | R   | R   | S | S | XDR |
| AX32 | A.<br>xylooxidans | Respiratory<br>sputum        | R | R | R   | R   | R   | R | S   | R   | R   | R   | S | R | XDR |
| AX35 | A.<br>xylooxidans | Respiratory<br>sputum        | R | R | R   | N/A | N/A | R | I   | R   | S   | R   | S | S | XDR |

|             |                    |                       |   |   |   |     |     |   |   |   |   |   |   |   |     |
|-------------|--------------------|-----------------------|---|---|---|-----|-----|---|---|---|---|---|---|---|-----|
| <b>AX37</b> | A.<br>xylosoxidans | Peritoneal<br>Fluid   | R | R | R | N/A | N/A | R | S | R | I | R | S | S | XDR |
| <b>AX40</b> | A.<br>xylosoxidans | Respiratory<br>sputum | R | R | R | N/A | N/A | R | I | R | R | R | S | S | XDR |
| <b>AX43</b> | A.<br>xylosoxidans | Respiratory<br>sputum | R | R | R | N/A | N/A | R | I | R | S | R | S | S | XDR |
| <b>AX45</b> | A.<br>xylosoxidans | Respiratory<br>sputum | R | R | R | N/A | N/A | R | S | R | I | R | S | S | XDR |
| <b>AX49</b> | A.<br>xylosoxidans | Eye-<br>conjunctiva   | R | R | R | R   | R   | R | S | R | I | R | I | S | XDR |
| <b>AX51</b> | A.<br>xylosoxidans | Respiratory<br>sputum | R | R | R | N/A | N/A | R | S | R | I | R | I | S | XDR |
| <b>AX53</b> | A.<br>xylosoxidans | Tracheal<br>Aspirate  | R | R | R | N/A | N/A | R | R | I | S | R | I | S | XDR |
| <b>AX54</b> | A.<br>xylosoxidans | Respiratory<br>sputum | R | R | R | S   | R   | R | S | R | I | R | S | S | XDR |
| <b>AX56</b> | A.<br>xylosoxidans | Respiratory<br>sputum | R | R | R | N/A | N/A | I | S | R | I | R | S | S | XDR |

<sup>3</sup>Susceptibility to antimicrobial agents is shown as R (resistant), I (intermediate), or S (susceptible). 23 isolates were classified as multidrug-resistant (MDR), i.e., resistant to at most the total number of antimicrobial categories minus two, and the remaining isolates as extensively drug-resistant (XDR), i.e., non-susceptible to all but two or fewer categories (susceptible to only one or two categories).

**Table S2.** Achromobacter phages with available genome data in the NCBI Taxonomy database.

| Phage name          | Genome length (bp) | Gene Bank ID | Phage name          | Genome length (bp) | Gene Bank ID |
|---------------------|--------------------|--------------|---------------------|--------------------|--------------|
| Kuwaak_TL2          | 46215              | 3076825      | vB_AxyS_19-32_Axy18 | 45500              | 2591052      |
| Hasilly_LB3         | 46478              | 3076824      | vB_AxyS_19-32_Axy16 | 46178              | 2591051      |
| Ewik_TL4            | 50543              | 3076823      | vB_AxyS_19-32_Axy14 | 46703              | 2591050      |
| Ehaak_LB5           | 46435              | 3076822      | vB_AxyS_19-32_Axy06 | 45830              | 2591049      |
| Tuull               | 47460              | 3074846      | vB_AxyP_19-32_Axy24 | 74744              | 2591048      |
| JWT                 | 46410              | 3070119      | vB_AxyP_19-32_Axy23 | 43773              | 2591047      |
| 2-1                 | 82711              | 3061295      | vB_AxyP_19-32_Axy22 | 71710              | 2591046      |
| Shaaii_LB_5         | 45029              | 3043593      | vB_AxyP_19-32_Axy21 | 43049              | 2591045      |
| Nyashin_LB6         | 45982              | 3043592      | vB_AxyP_19-32_Axy13 | 70103              | 2591044      |
| Nyaak_TL1           | 46478              | 3043591      | vB_AxyP_19-32_Axy12 | 74096              | 2591043      |
| Maay_LB1            | 46086              | 3043590      | vB_AxyP_19-32_Axy11 | 73413              | 2591042      |
| Kwar_LB4            | 33215              | 3043589      | vB_AxyP_19-32_Axy10 | 73898              | 2591041      |
| Ewii_LB8            | 43305              | 3043587      | vB_AxyP_19-32_Axy09 | 43049              | 2591040      |
| Emuu_LB7            | 46012              | 3043586      | vB_AxyP_19-32_Axy04 | 73834              | 2591039      |
| SE2                 | 45648              | 3043584      | vB_Ade_ART          | 95343              | 2292880      |
| CF419P1             | 58030              | 3043583      | phiAxp-3            | 72825              | 1664247      |
| AXY1                | 61950              | 2884451      | phiAxp-2            | 62220              | 1664246      |
| vB_AchrS_AchV4      | 59489              | 2796514      | phiAxp-1            | 45045              | 1610509      |
| Mano                | 42452              | 2767570      | JWF                 | 81541              | 1589748      |
| AMA2                | 45901              | 2723727      | 83-24               | 48216              | 1589747      |
| AMA1                | 46328              | 2723726      | JWX                 | 49714              | 1589746      |
| Motura              | 221431             | 2591403      | JWAalpha            | 72329              | 1416009      |
| vB_AxyS_19-32_Axy20 | 46352              | 2591054      | JWDelta             | 73659              | 1416008      |
| vB_AxyS_19-32_Axy19 | 46036              | 2591053      |                     |                    |              |

A)

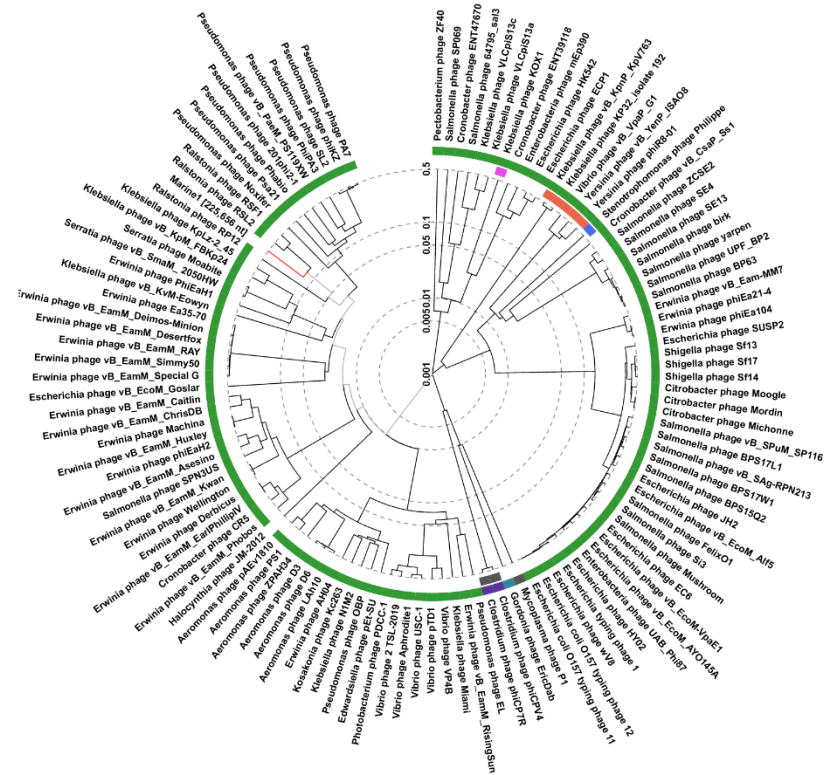

B)

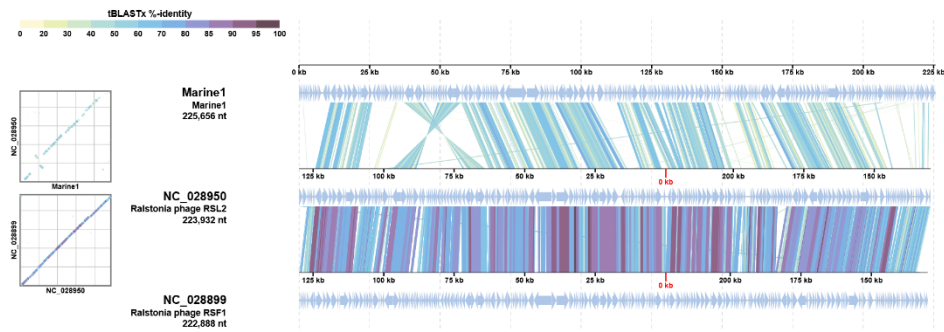

**Figure S1.** Jumbo phage Marine1 phylogenetic relationships. A) Phage Proteomic Tree including related phages to phage Marine1. B) Genome maps of closest relatives to Marine1.

**Figure S2.** Phage-Antibiotics-Synergy between meropenem and phages BuckLyse, Kaach or Taco in *Achromobacter xylosoxidans* AX19. Multiplicity Of Infection of 0.1, 1 and 10 were tested; meropenem concentrations between 64 mcg/mL to 1/64 mcg/mL were tested in liquid media at 37°C over 24 hours. Percentage growth was calculated relative to the no-treatment (A-C), meropenem breakpoints are shown with a red-dotted line. Representative growth curves (D-F). Differences in percentage growth over antibiotic concentrations at MOI of 1 (G-I), significant thresholds are shown as  $p \leq 0.05$  (\*),  $p \leq 0.01$  (\*\*),  $p \leq 0.001$  (\*\*\*),  $p > 0.05$  not significant and not shown.

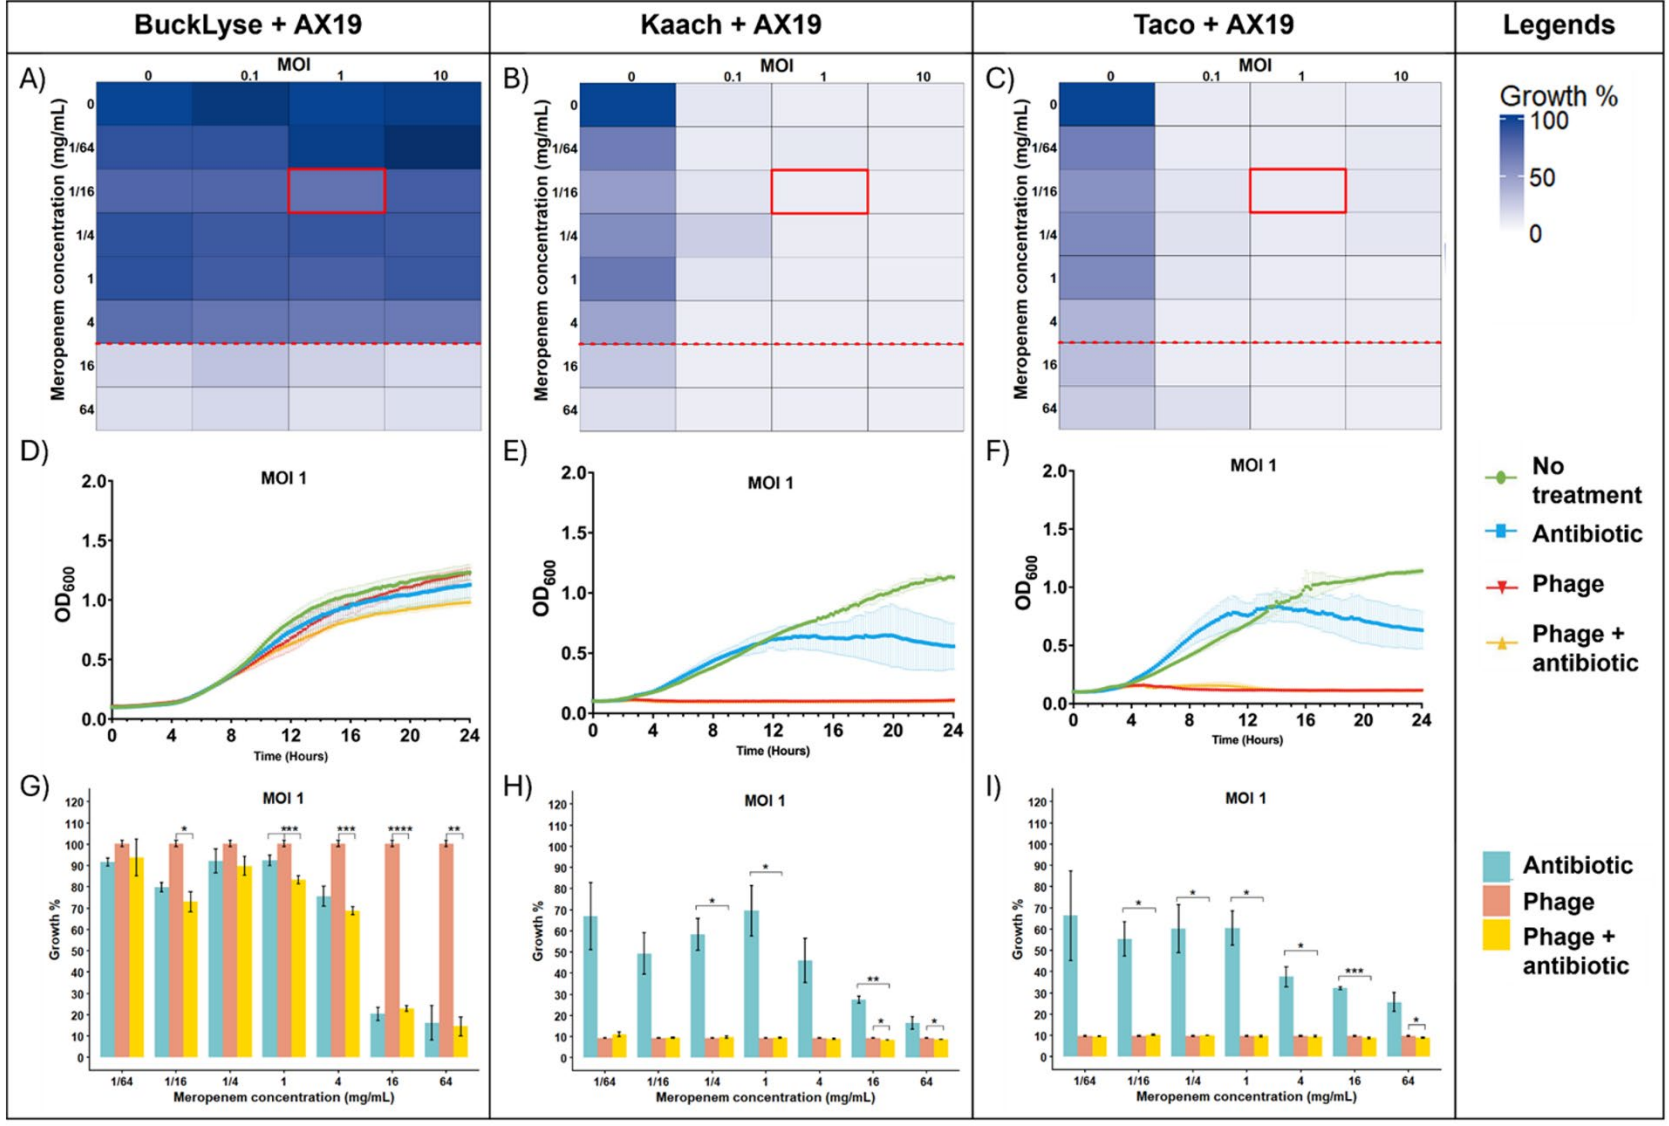

**Figure S3.** Phage-Antibiotics-Synergy between ceftazidime and phages BuckLyse, Kaach or Taco in *Achromobacter xylosoxidans* AX31. Multiplicity Of Infection of 0.1, 1 and 10 were tested; ceftazidime concentrations between 64 mcg/mL to 1/64 mcg/mL were tested in liquid media at 37°C over 24 hours. Percentage growth was calculated relative to the no-treatment (A-C), ceftazidime breakpoints are shown with a red-dotted line. Representative growth curves (D-F). Differences in percentage growth over antibiotic concentrations at MOI of 1 (G-I), significant thresholds are shown as  $p \leq 0.05$  (\*),  $p \leq 0.01$  (\*\*),  $p \leq 0.001$  (\*\*\*),  $p > 0.05$  not significant and not shown

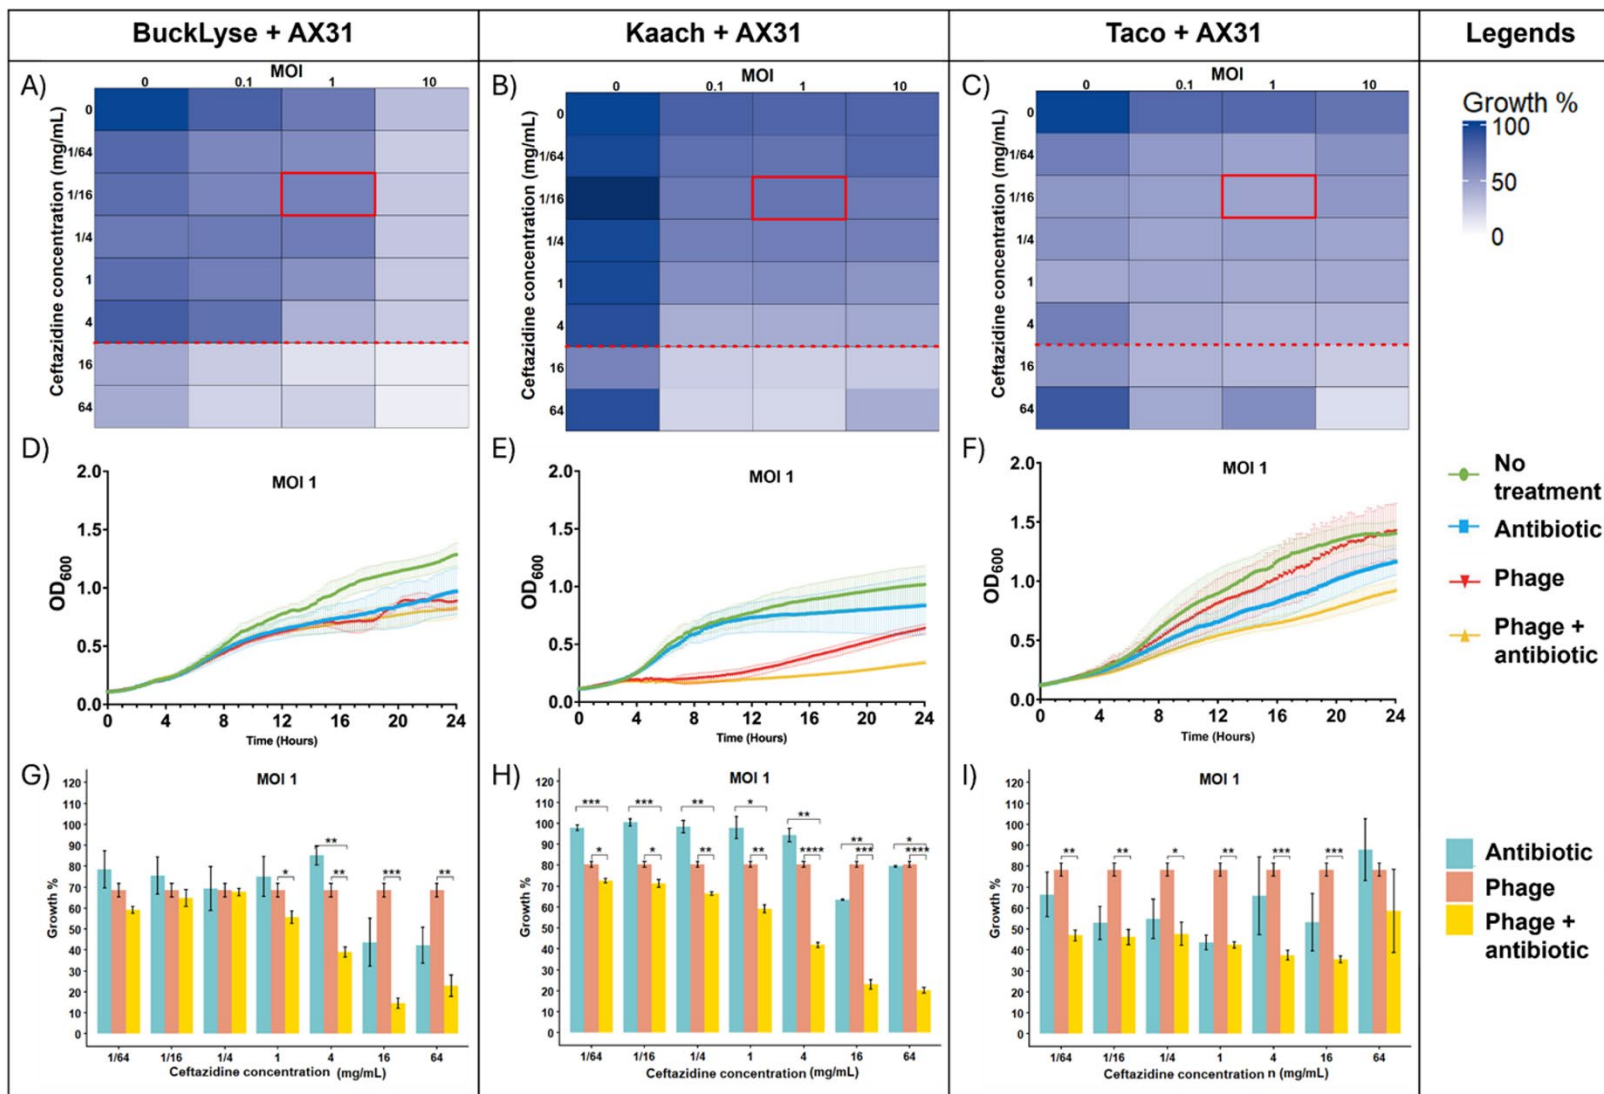

**Figure S4.** Phage-Antibiotics-Synergy between ceftazidime and phages BuckLyse, Kaach or Taco in *Achromobacter xylosoxidans* AX19. Multiplicity Of Infection of 0.1, 1 and 10 were tested; ceftazidime concentrations between 64 mcg/mL to 1/64 mcg/mL were tested in liquid media at 37°C over 24 hours. Percentage growth was calculated relative to the no-treatment (A-C), ceftazidime breakpoints are shown with a red-dotted line. Representative growth curves (D-F). Differences in percentage growth over antibiotic concentrations at MOI of 1 (G-I), significant thresholds are shown as  $p \leq 0.05$  (\*),  $p \leq 0.01$  (\*\*),  $p \leq 0.001$  (\*\*\*),  $p > 0.05$  not significant and not shown.

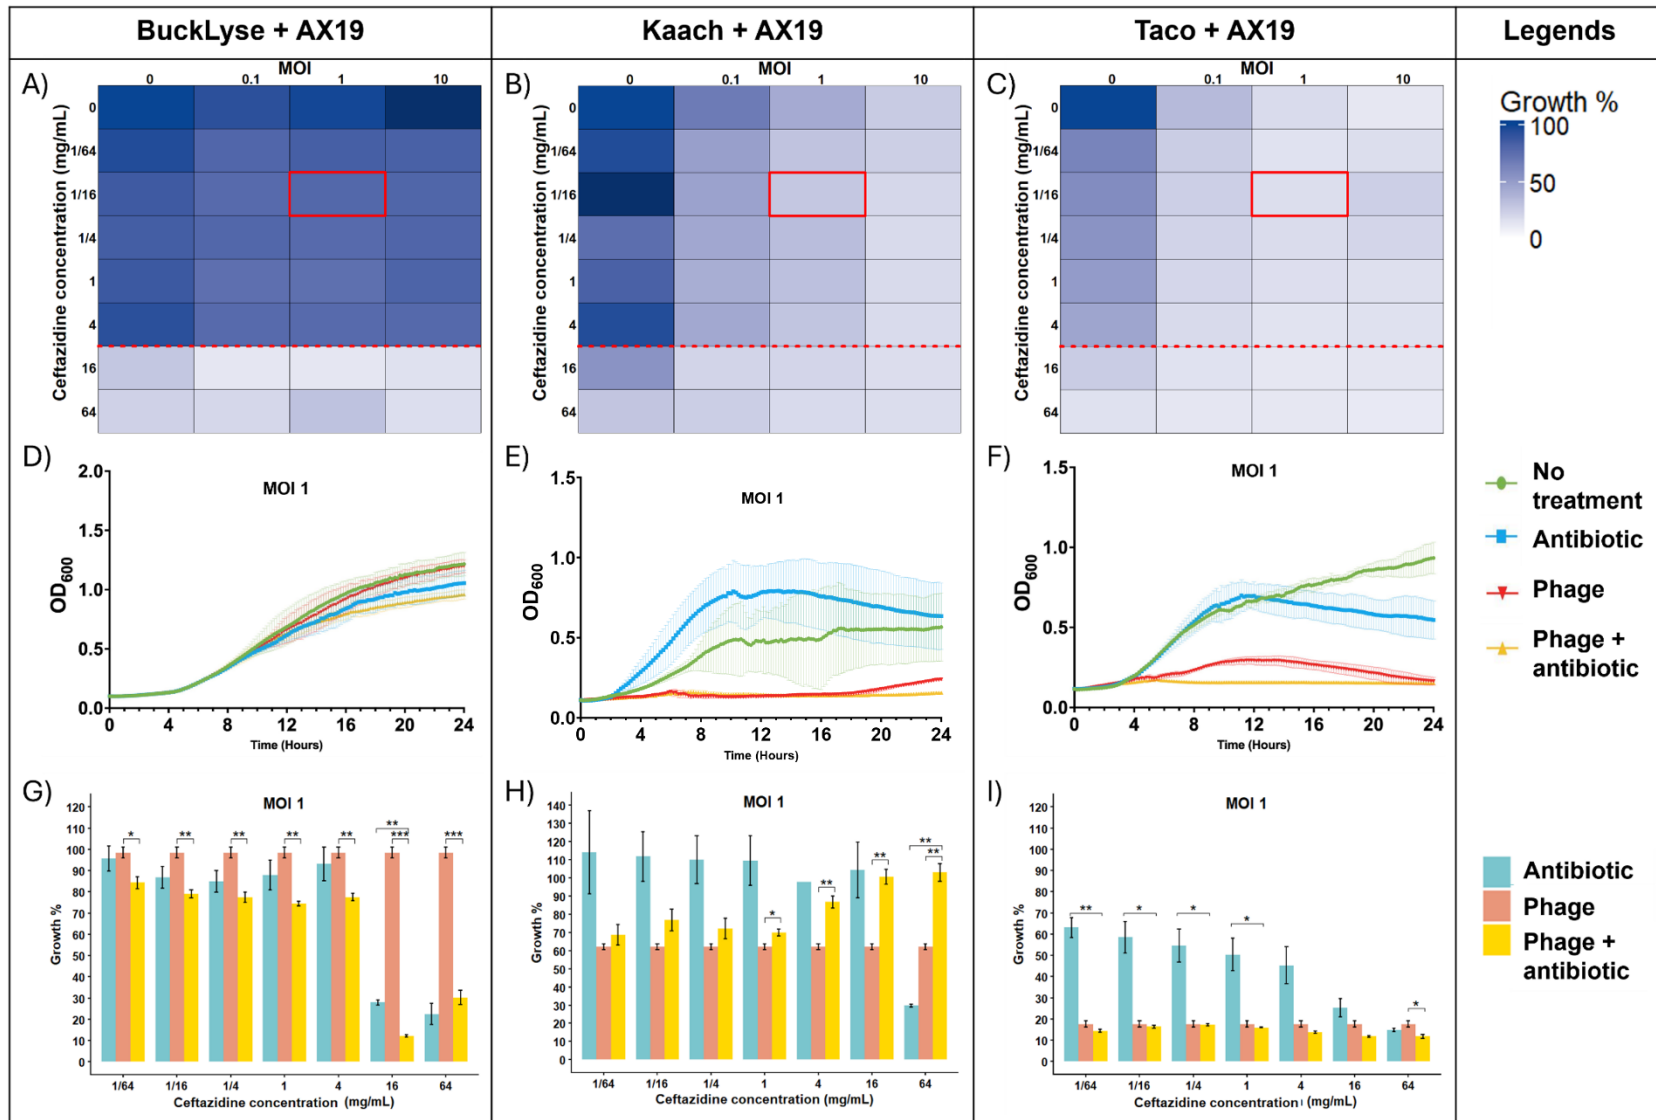

**Figure S5.** Phage-Antibiotics-Synergy between trimethoprim-sulfamethoxazole and phages BuckLyse, Kaach or Taco in *Achromobacter xylosoxidans* AX31. Multiplicity Of Infection of 0.1, 1 and 10 were tested; tmp/sulfa concentrations between 64 mcg/mL to 1/64 mcg/mL were tested in liquid media at 37°C over 24 hours. Percentage growth was calculated relative to the no-treatment (A-C), tmp/sulfa breakpoints are shown with a red-dotted line. Representative growth curves (D-F). Differences in percentage growth over antibiotic concentrations at MOI of 1 (G-I), significant thresholds are shown as  $p \leq 0.05$  (\*),  $p \leq 0.01$  (\*\*),  $p \leq 0.001$  (\*\*\*),  $p > 0.05$  not significant and not shown.

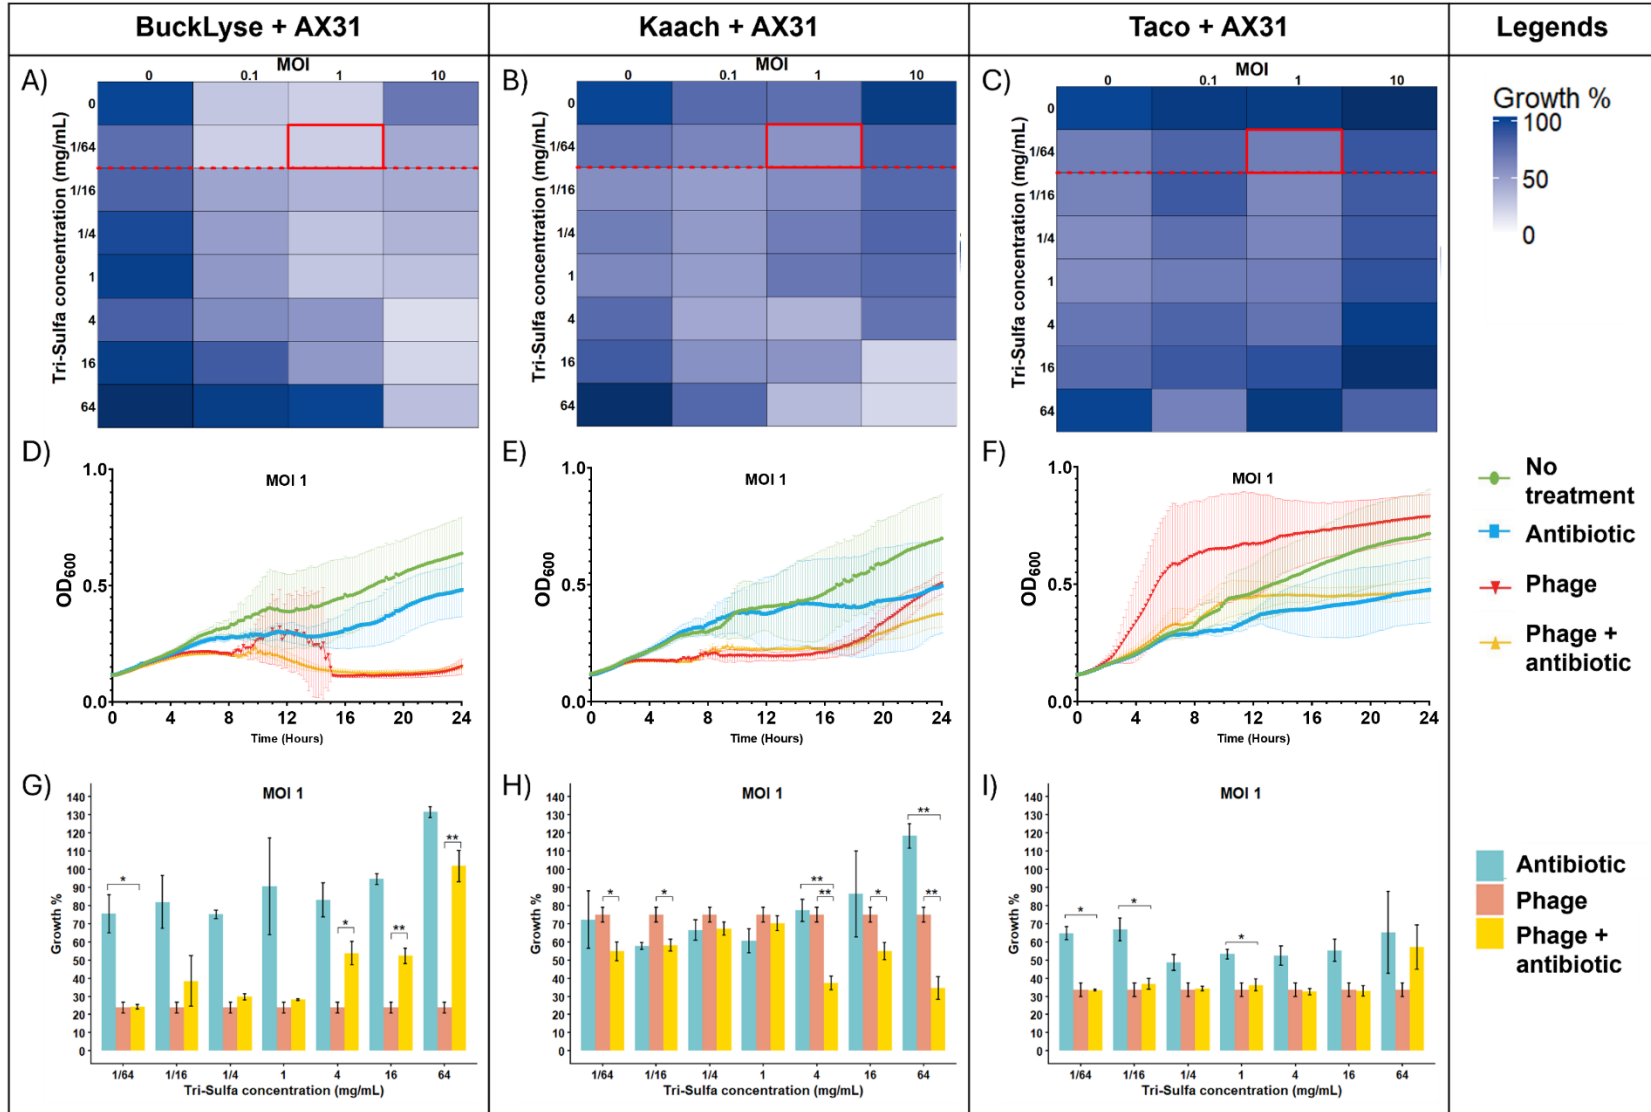

**Figure S6.** Phage-Antibiotics-Synergy between trimethoprim-sulfamethoxazole and phages BuckLyse, Kaach or Taco in *Achromobacter xylosoxidans* AX19. Multiplicity Of Infection of 0.1, 1 and 10 were tested; tmp/sulfa concentrations between 64 mcg/mL to 1/64 mcg/mL were tested in liquid media at 37°C over 24 hours. Percentage growth was calculated relative to the no-treatment (A-C), tmp/sulfa breakpoints are shown with a red-dotted line. Representative growth curves (D-F). Differences in percentage growth over antibiotic concentrations at MOI of 1 (G-I), significant thresholds are shown as  $p \leq 0.05$  (\*),  $p \leq 0.01$  (\*\*),  $p \leq 0.001$  (\*\*\*),  $p > 0.05$  not significant and not shown.

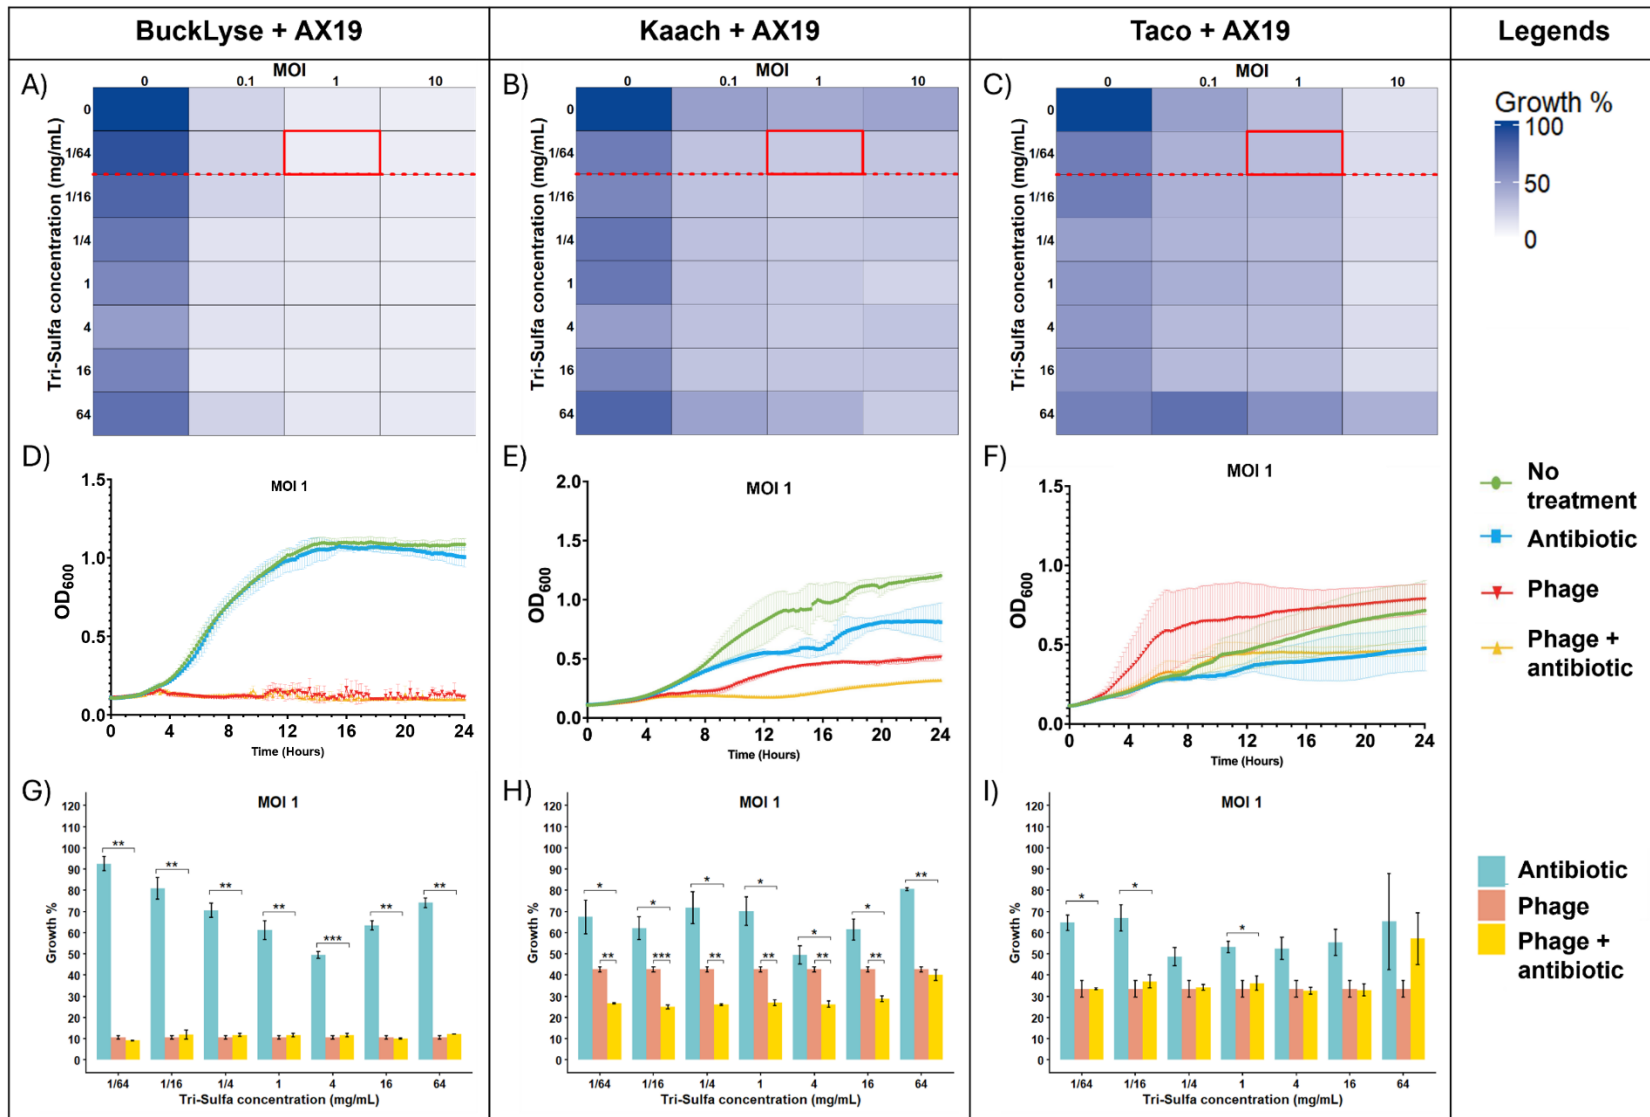

**Figure S7.** Phage-Antibiotics-Synergy between levofloxacin and phages BuckLyse, Kaach or Taco in *Achromobacter xylosoxidans* AX31. Multiplicity Of Infection of 0.1, 1 and 10 were tested; levofloxacin concentrations between 64 mcg/mL to 1/64 mcg/mL were tested in liquid media at 37°C over 24 hours. Percentage growth was calculated relative to the no-treatment (A-C), levofloxacin breakpoints are shown with a red-dotted line. Representative growth curves (D-F). Differences in percentage growth over antibiotic concentrations at MOI of 1 (G-I), significant thresholds are shown as  $p \leq 0.05$  (\*),  $p \leq 0.01$  (\*\*),  $p \leq 0.001$  (\*\*\*),  $p > 0.05$  not significant and not shown.

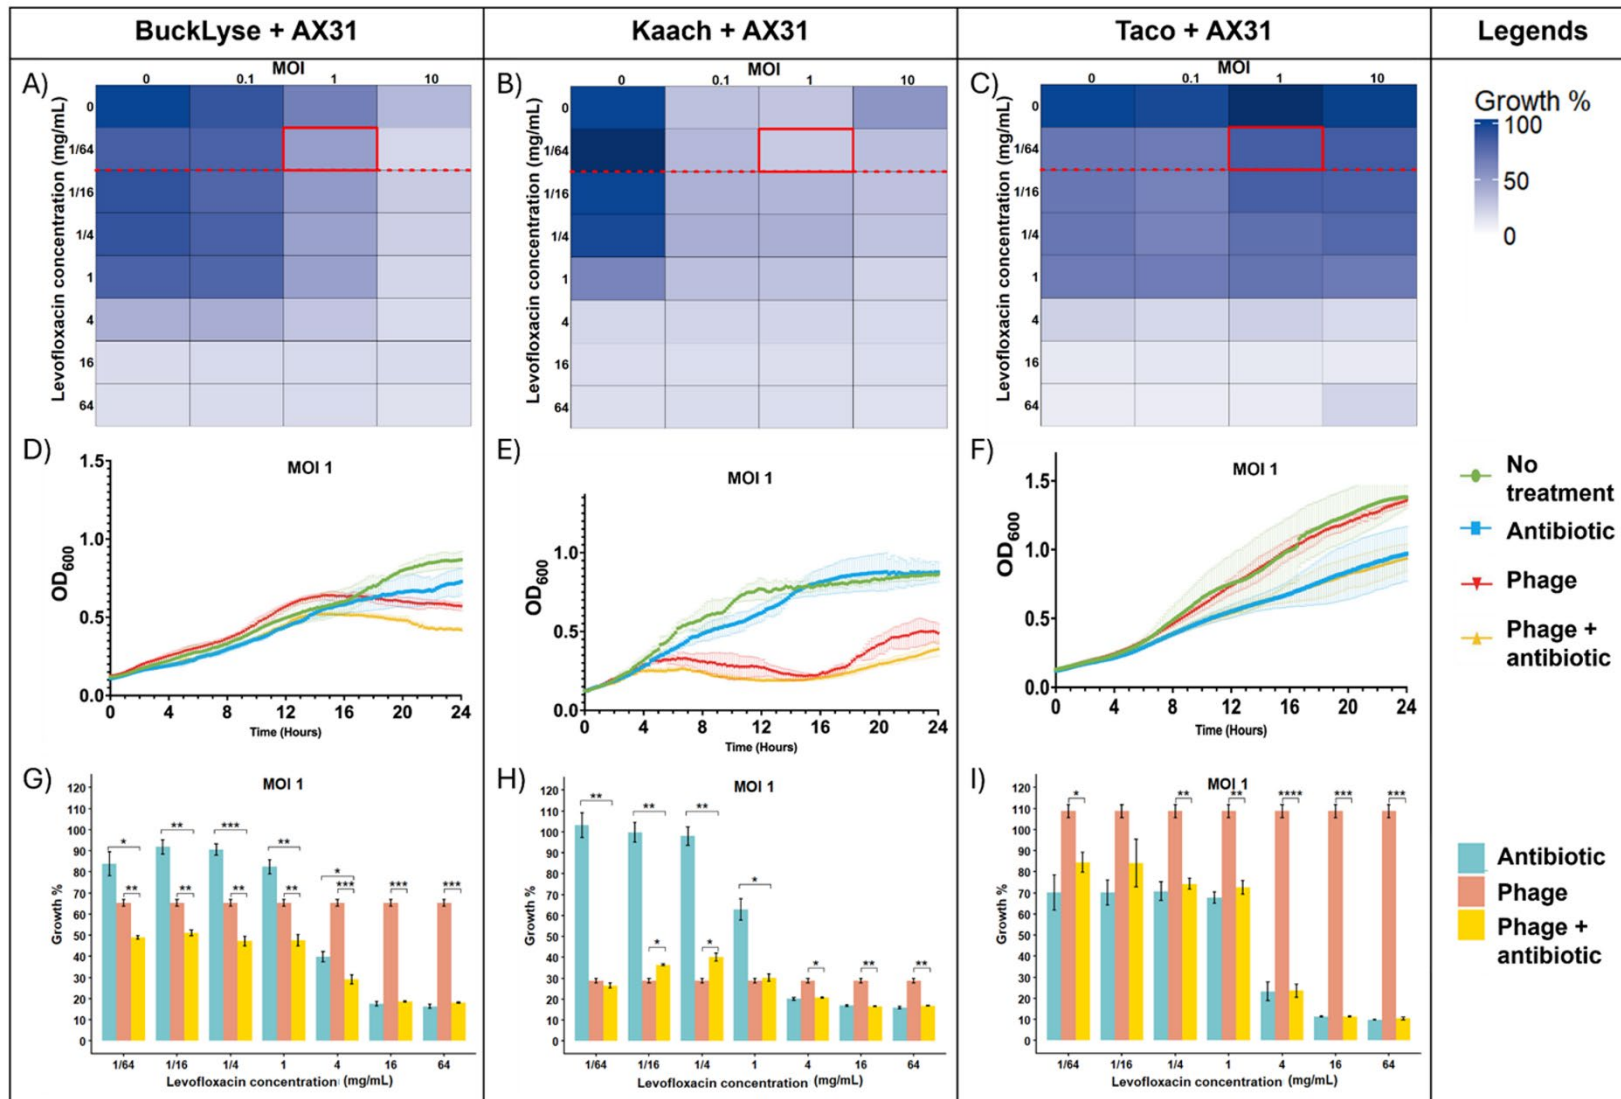

**Figure S8.** Phage-Antibiotics-Synergy between levofloxacin and phages BuckLyse, Kaach or Taco in *Achromobacter xylosoxidans* AX19. Multiplicity Of Infection of 0.1, 1 and 10 were tested; levofloxacin concentrations between 64 mcg/mL to 1/64 mcg/mL were tested in liquid media at 37°C over 24 hours. Percentage growth was calculated relative to the no-treatment (A-C), levofloxacin breakpoints are shown with a red-dotted line. Representative growth curves (D-F). Differences in percentage growth over antibiotic concentrations at MOI of 1 (G-I), significant thresholds are shown as  $p \leq 0.05$  (\*),  $p \leq 0.01$  (\*\*),  $p \leq 0.001$  (\*\*\*),  $p > 0.05$  not significant and not shown.

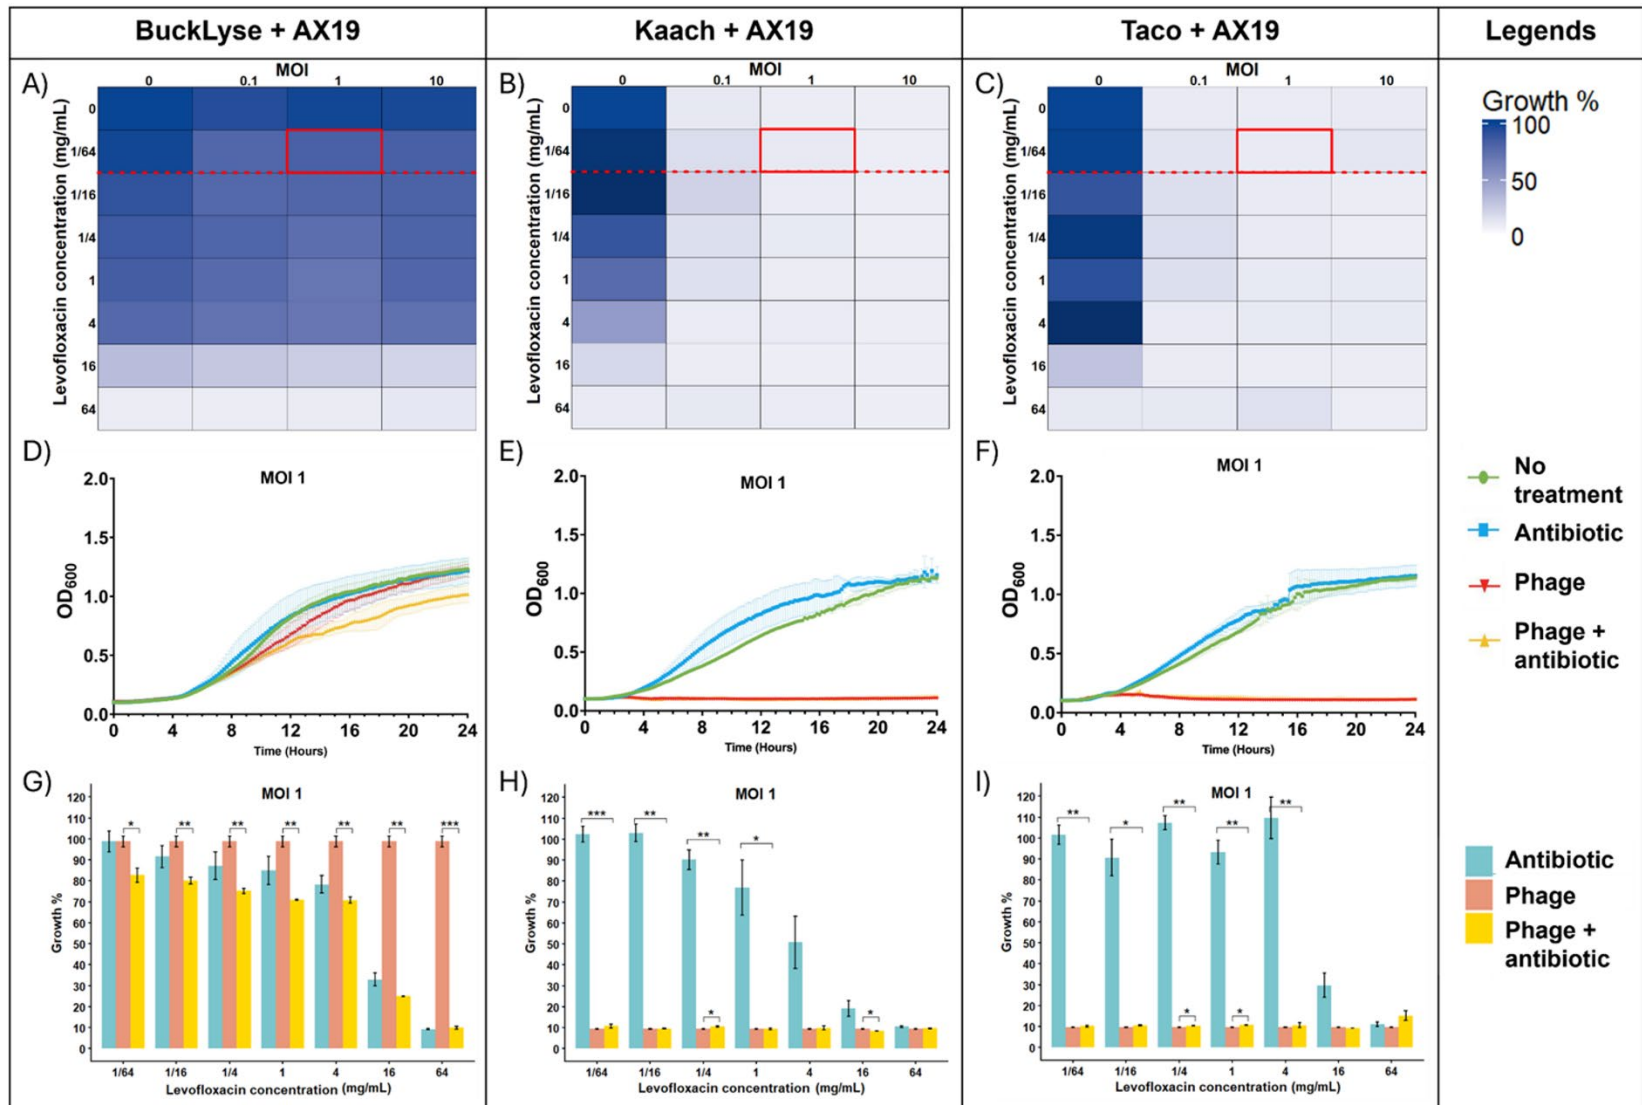

Supplement: Supplementary file 1 [file 82c7d5277790898de8de31af.pdf]
