# Supplementary material for: Antibiotic resistant Achromobacter xylosoxidans are highly susceptible to bacteriophages and often are killed synergistically by phage/antibiotic combinations
Source: Research Square preprint supplement (doi:10.21203/rs.3.rs-9371970/v1), 2026-04-30
Supplement: Supplementary file 2 [file a26887a516b6c265a53361c5.docx]

**Table 1.** Genome characteristics and isolation sources for phages identified in this study.

| Phage name | Genome size (bp) | Total proteins | % hypothetical proteins | Isolation Source | GeneBank ID |
| --- | --- | --- | --- | --- | --- |
| Papale | 45,488 | 76 | 92% | Wastewater from PA, USA | PV441885 |
| Thup | 61,349 | 93 | 45% | UCSD wastewater, CA, USA | PV340829 |
| Taco | 44,326 | 75 | 92% | Wastewater from PA, USA | PV340830 |
| Barbera | 93,528 | 472 | 63% | UCSD wastewater, CA, USA | PV340831 |
| Kaach | 50,395 | 89 | 83% | Imperial Beach, CA, USA | PV340832 |
| MochiFu | 45,993 | 137 | 81% | Wastewater from PA, USA | PV340833 |
| MayoRox | 46,092 | 77 | 95% | Mayo Rox, OH, USA | PV340834 |
| Malbec | 65,576 | 101 | 56% | UCSD wastewater, CA, USA | PV340835 |
| Kiitash | 41,767 | 60 | 72% | San Diego River, CA, USA | PV340836 |
| Fargo | 43,287 | 77 | 70% | Los Peñasquitos, CA, USA | PV324754 |
| Ewill | 45,694 | 69 | 94% | Imperial Beach, CA, USA | PV340837 |
| BuckLyse | 45,974 | 74 | 93% | UCSD wastewater, CA, USA | PV340838 |
| Barolo | 45,903 | 75 | 92% | UCSD wastewater, CA, USA | PV340846 |
| Lo1 | 45,807 | 73 | 92% | UCSD wastewater, CA, USA | PV340845 |
| Cava | 45,798 | 73 | 92% | UCSD wastewater, CA, USA | PV340844 |
| Europa | 46,183 | 67 | 88% | UCSD wastewater, CA, USA | PV340843 |
| Siren | 98,908 | 147 | 96% | UCSD wastewater, CA, USA | PV324754 |
| Daedalus | 99,063 | 145 | 96% | UCSD wastewater, CA, USA | PV340842 |
| Theseus | 98,427 | 219 | 98% | UCSD wastewater, CA, USA | PV340841 |
| Mallory | 62,288 | 94 | 91% | UCSD wastewater, CA, USA | PV544237 |
| Sirah | 45,812 | 71 | 92% | UCSD wastewater, CA, USA | PV943645 |
| Nemas | 98,277 | 156 | 96% | Imperial Beach, CA, USA | PV340839 |
| Cabernet | 45,959 | 75 | 93% | UCSD wastewater, CA, USA | PV340840 |
| Kaykay | 45,818 | 71 | 90% | San Dieguito Lagoon, Del Mar, CA | PX354141 |
| Prosecco | 40,288 | 58 | 83% | UCSD wastewater, CA, USA | PZ013370 |
| Marine1 | 225,656 | 284 | 97% | UCSD wastewater, CA, USA | PZ013371 |
